# Supplementary material
Source: publisher site journal article supplement (https://www.dovepress.com/article/249622)
Supplement: Supplementary file 1 [file get_supplementary_file.php]

**Supplemental Figures: Size-dependent interactions of lipid-coated gold nanoparticles: developing a better mechanistic understanding through model cell membranes and in vivo toxicity**

Arek M. Engstrom,1 Ryan A. Faase,2 Grant Marquart,3 Joe E. Baio,2 Marilyn R. Mackiewicz,3 and Stacey L. Harper1,2,4

1Department of Environmental and Molecular Toxicology, Oregon State University, Corvallis, Oregon, United States; 2School of Chemical, Biological, and Environmental Engineering, Oregon State University, Corvallis, Oregon, United States; 3Department of Chemistry, Portland State University, Portland, Oregon, United States; 4Oregon Nanoscience and Microtechnologies Institute, Corvallis, Oregon, United States

Keywords: Gold nanoparticle, vibrational spectroscopy, nanoparticle-biological interactions, hybrid-lipid coated nanoparticle, toxicity, size-dependent interaction, zebrafish.

Corresponding Author: Dr. Stacey L. Harper, Stacey.Harper@oregonstate.edu


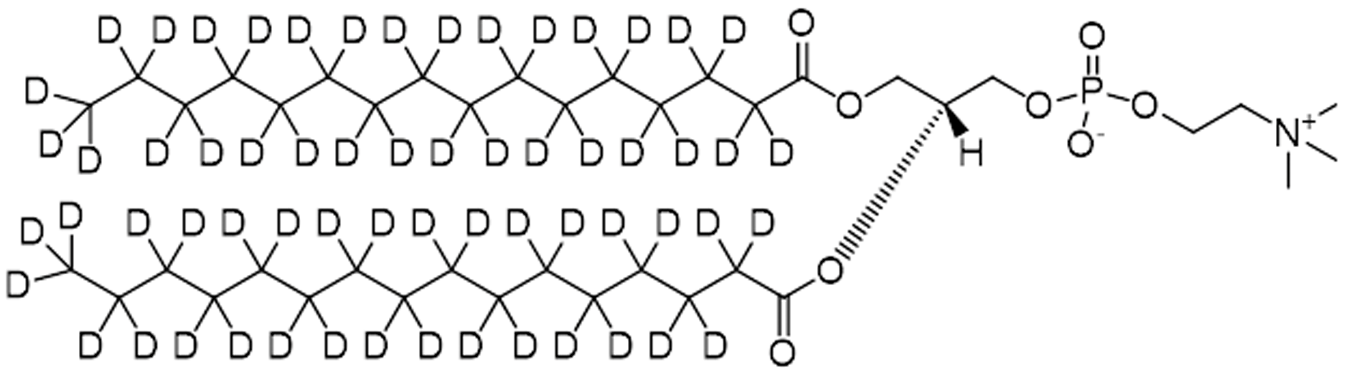


Figure S1. Deuterated 1,2-dipalmitoyl-d62-sn-glycero-3-phosphocholine (dDPPC)


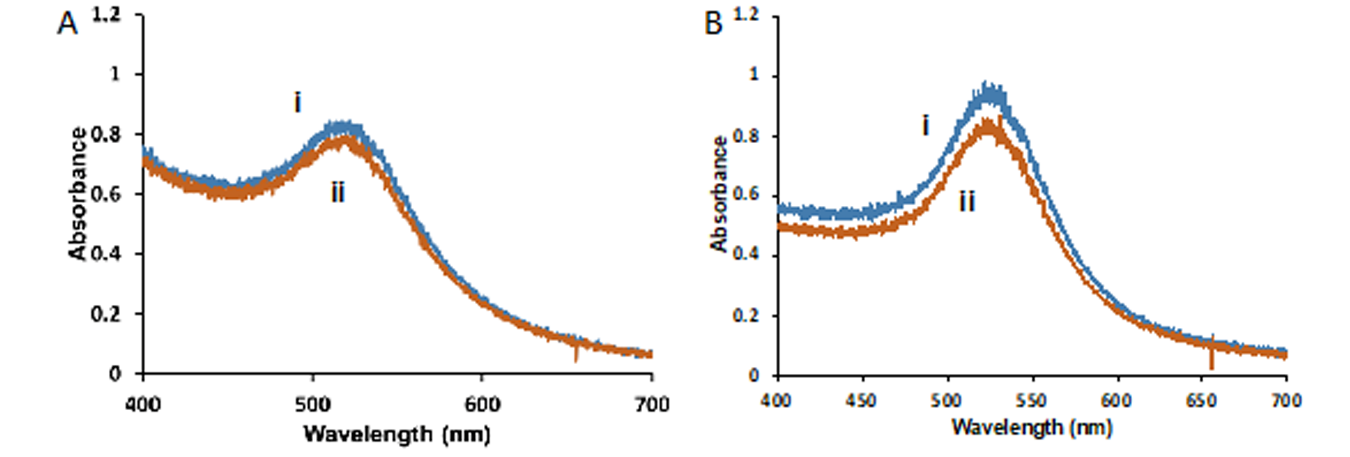


Figure S2. UV-Vis absorption spectra of (A) 10 nm and (B) 20 nm diameter i) Au-SOA-HPC-HT and ii) Au-SOA-HPC-HT in the presence of 6 mM cyanide for 1 h.


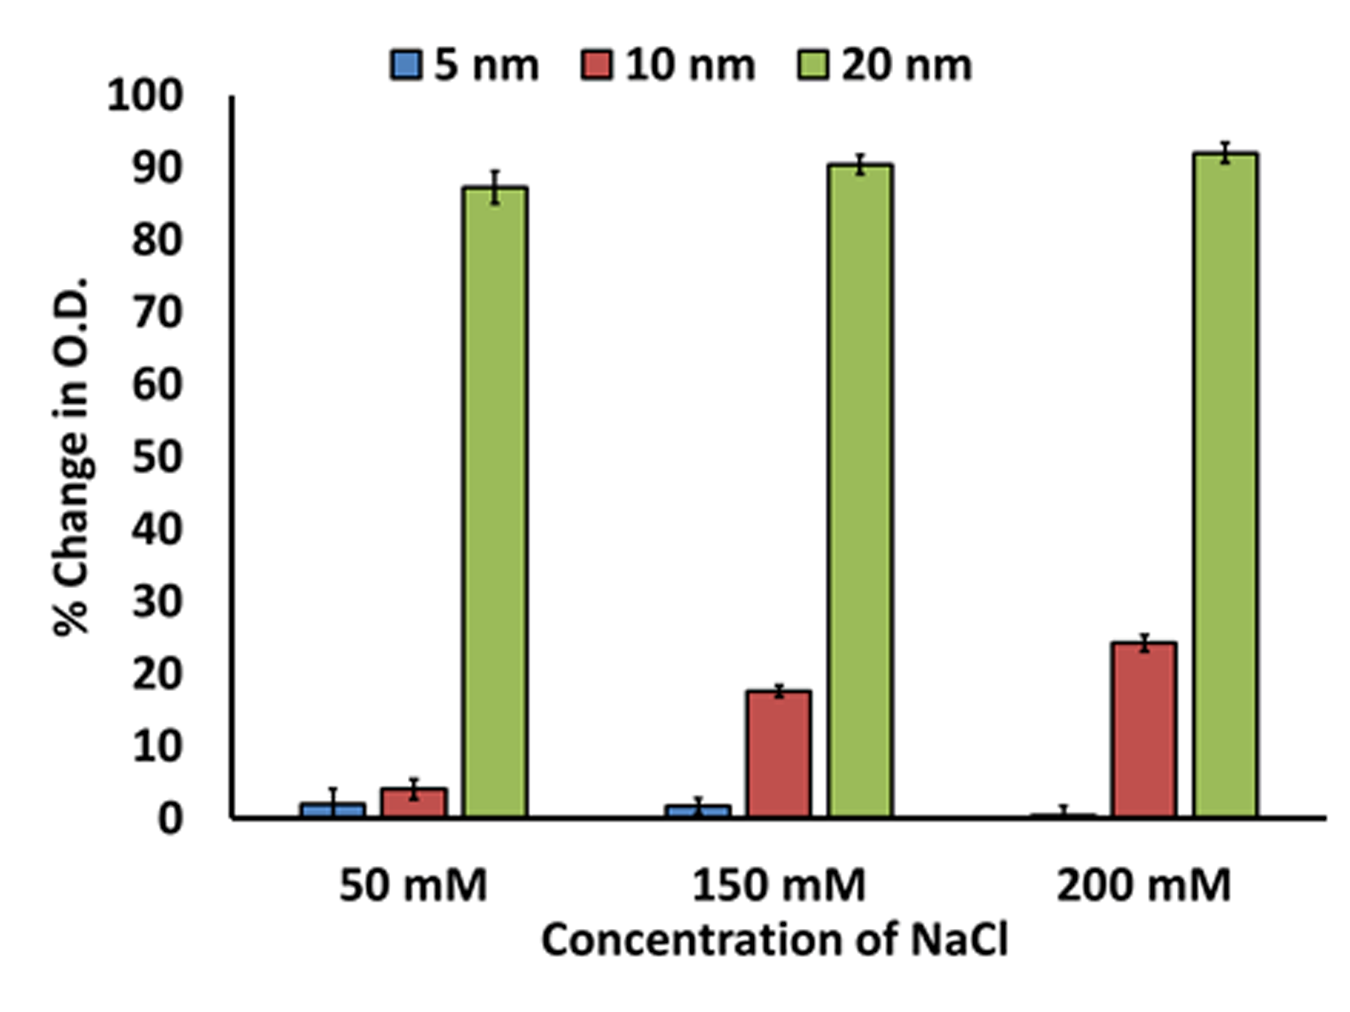


Figure S3. Percent change in O.D. of hybrid lipid capped Au-SOA-HPC-HT in 10 mM sodium phosphate buffer pH 8.0 after 24 h exposure to 50 mM, 150 mM, or 200 mM NaCl (aq). Data mean ± SE reported for n = 3.

**
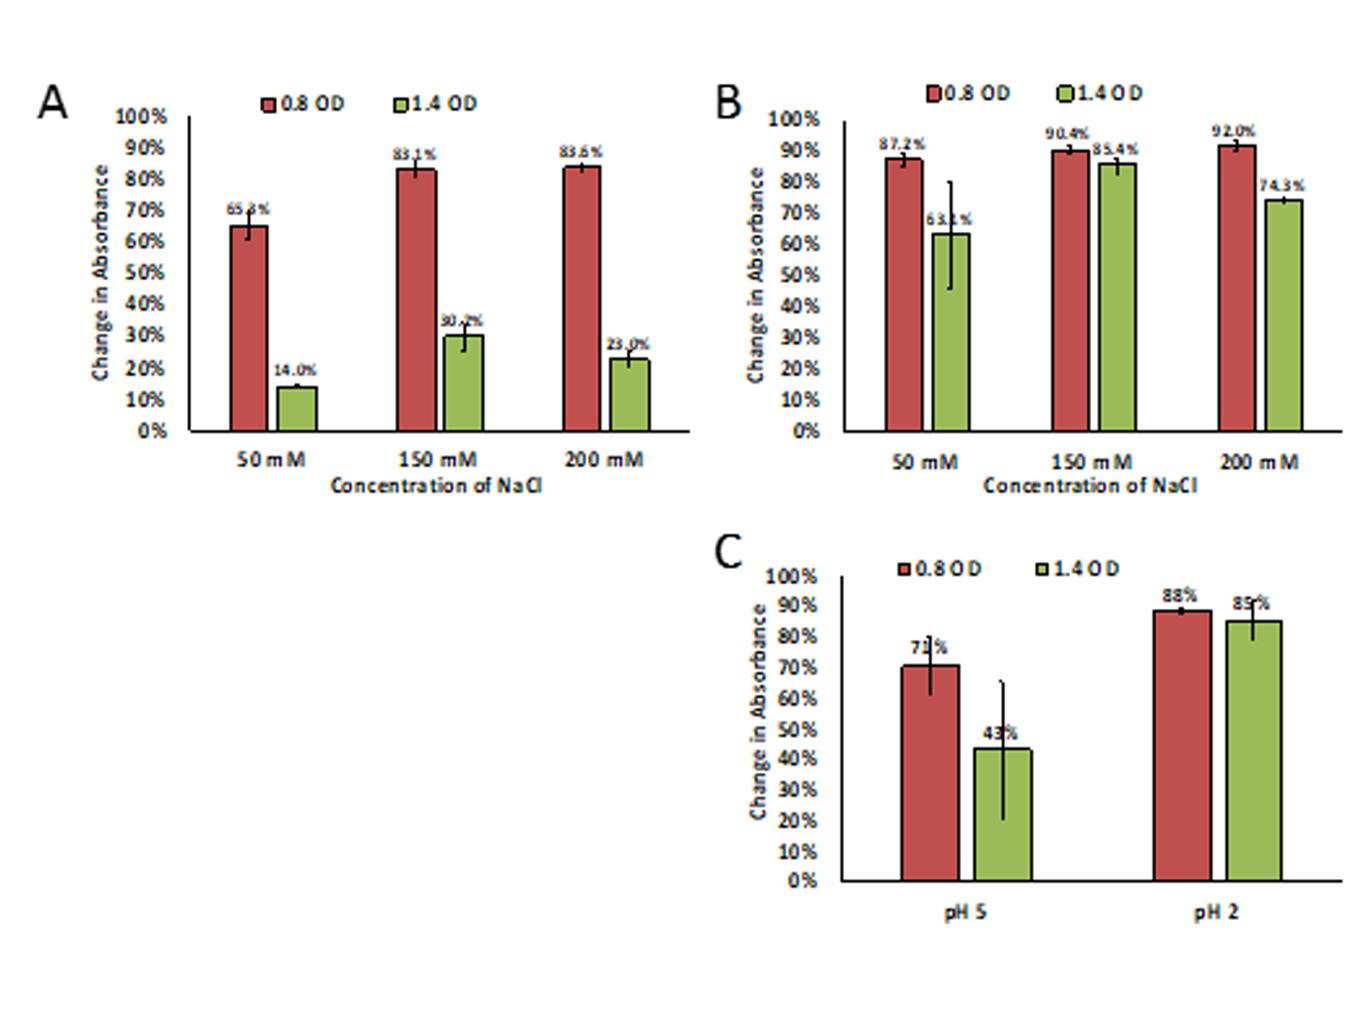
**

**Figure S4.** Percent change in O.D. of hybrid lipid capped 20 nm diameter HPC-AuNPs at (OD 0.8 = 4.7 x 1011 nps/ml) and (OD 1.4 = 8.2 x 1011 nps/ml) after exposure to 50 mM, 150 mM, or 200 mM NaCl (aq) in 10 mM sodium phosphate buffer pH 8.0 after (**A**) 1 h and (**B**) 24 h, as well as (**C**) after adjustment of pH to 2 and 5 with 2 M HCl (aq) after 1 h. Data mean ± SE reported for n = 2.


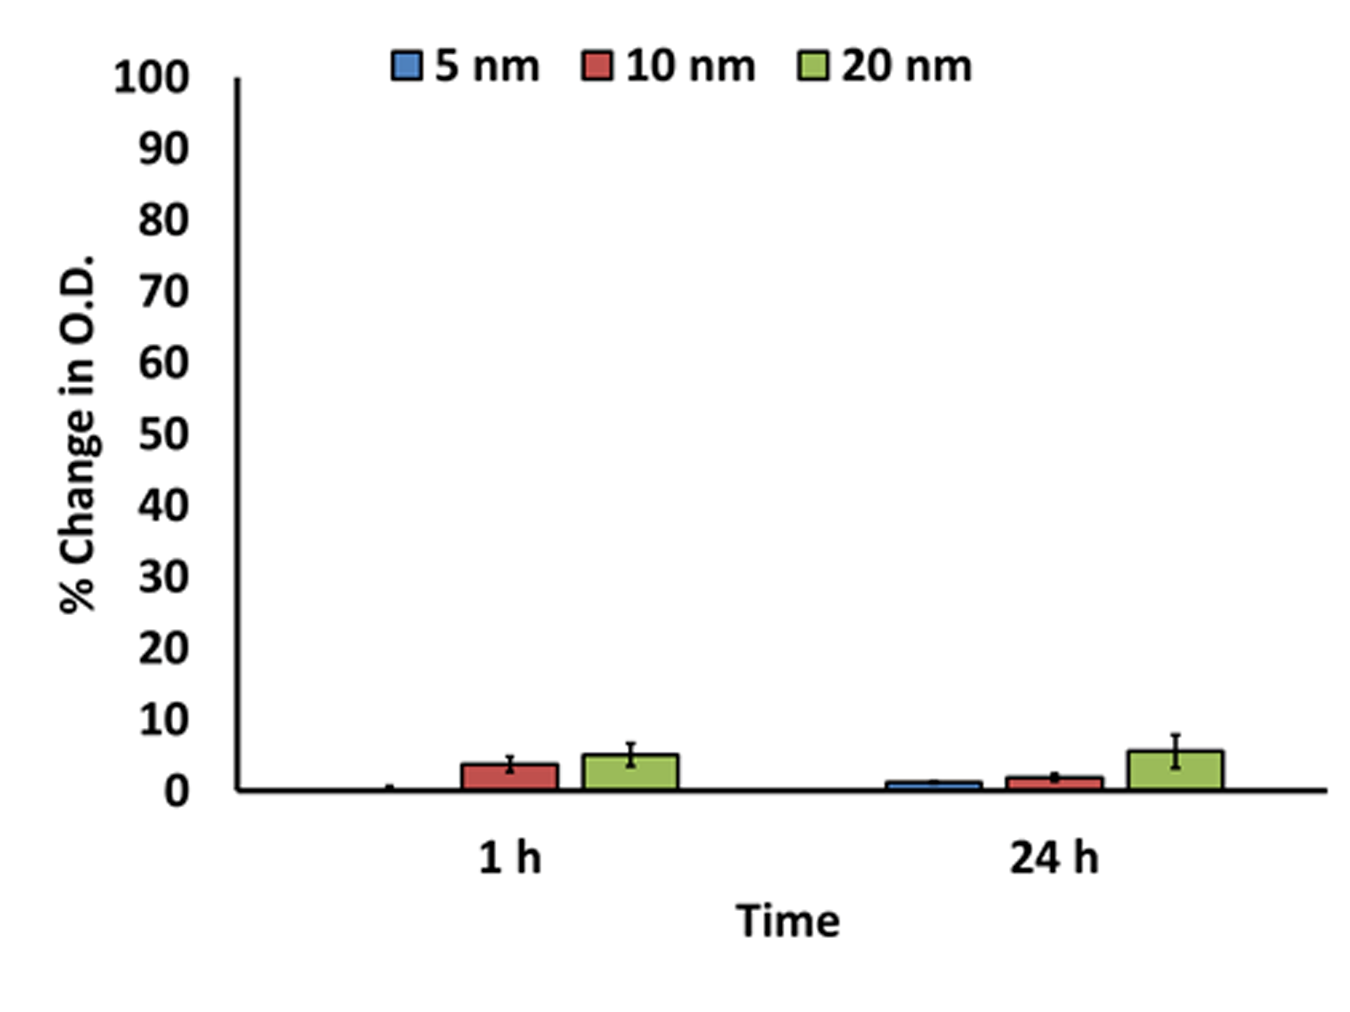


Figure S5. Percent change in O.D. of hybrid lipid capped Au-SOA-HPC-HT mixed with FW in a 1:1 ratio. Data mean ± SE reported for n = 3.

**Table S1.** Gold nanoparticle characterization of primary particles purchased from Ted Pella.

|  | Primary Particle Size by TEM  (nm) | λmax  (nm) | O.D. at λmax | Concentration  (NPs/mL) |
| --- | --- | --- | --- | --- |
| 5 nm AuNPs | 5.6 ± 0.84 | 520 | 0.75 | 5.00*1013 |
| 10 nm AuNPs | 9.4 ± 0.85 | 520 | 0.74 | 5.70*1012 |
| 20 nm AuNPs | 19.7 ± 1.58 | 524 | 1.04 | 7.00*1011 |

Table S2. Peak assignments for lipids and nanoparticles

|  | **CD3-SS** | **CD2-SS** | **CD3-FR** | **CD2-AS** | **CD3-AS** | **CH2-AS** | **CH3-AS** |
| --- | --- | --- | --- | --- | --- | --- | --- |
| **ω (cm-1)** | 2075 | 2100 | 2130 | 2200 | 2222 | 2913 | 2963 |

Table S3. Fits for lipids and nanoparticles in CD region

|  | **NR bkg.** | **ϕ** | **ωq (cm-1)** | **Γq (cm-1)** | **Aq** |
| --- | --- | --- | --- | --- | --- |
| **dDPPC** | 0.0035 | 2.70 | 2073 | 12 | 0.0651 |
|  |  |  | 2101 | 12 | 0.0233 |
|  |  |  | 2130 | 55 | 0.2226 |
|  |  |  | 2200 | 15 | -0.0226 |
|  |  |  | 2222 | 12 | -0.0408 |
|  |  |  |  |  |  |
| **dDPPC + 5nm** | 0.0035 | 2.70 | 2076 | 12 | 0.0602 |
|  |  |  | 2097 | 12 | 0.0051 |
|  |  |  | 2130 | 55 | 0.1774 |
|  |  |  | 2200 | 50 | -0.1002 |
|  |  |  | 2222 | 12 | -0.0156 |
|  |  |  |  |  |  |
| **dDPPC + 20nm (t)** | 0.0068 | 1.86 | 2077 | 12 | 0.0482 |
|  |  |  | 2099 | 12 | 0.0177 |
|  |  |  | 2130 | 55 | 0.4210 |
|  |  |  | 2200 | 50 | -0.0650 |
|  |  |  | 2222 | 12 | -0.0150 |
| **dDPPC + 20nm (l)** | - | - | - | - | - |

Table S4. Fits for lipids and nanoparticles in CH region

|  | **NR bkg.** | **ϕ** | **ωq (cm-1)** | **Γq (cm-1)** | **Aq** |
| --- | --- | --- | --- | --- | --- |
| **dDPPC** | 0.0014 | 4.43 | 2852 | 12 | 0.0100 |
|  |  |  | 2877 | 12 | 0.0061 |
|  |  |  | 2912 | 12 | 0.0264 |
|  |  |  | 2940 | 35 | 0.0514 |
|  |  |  | 2967 | 12 | 0.0404 |
|  |  |  |  |  |  |
| **5nm** | 0.0014 | 4.43 | 2858 | 12 | 0.0139 |
|  |  |  | 2883 | 12 | 0.0071 |
|  |  |  | 2915 | 12 | 0.0432 |
|  |  |  | 2940 | 35 | 0.1596 |
|  |  |  | 2963 | 12 | 0.0364 |
|  |  |  |  |  |  |
| **10nm** | 0.0014 | 4.43 | 2913 | 12 | 0.0647 |
|  |  |  | 2940 | 60 | 0.2044 |
|  |  |  | 2964 | 12 | 0.0317 |
|  |  |  |  |  |  |
| **20nm** | 0.0014 | 4.43 | 2913 | 12 | 0.0581 |
|  |  |  | 2940 | 60 | 0.1639 |
|  |  |  | 2964 | 12 | 0.0206 |

Lipid calculation and synthesis of hybrid HPC-AuNPs

The amount of lipids necessary to fully encapsulate the AuNPs is derived from beer’s law and **Equation S1**, which converts the absorbance of the stock solution into concentration. This is based on previous studies using similar gold nanospheres.1

𝑙𝑛 𝜀 = 𝑘 𝑙𝑛 𝐷+𝑎 (**S1**)

Where D is the diameter of the nanoparticles to be covered, k and a are constants 3.32 and 10.8 respectively, and ε is the extinction coefficient. The number of entities (N) in 1 mL of solution is then derived by multiplying the concentration of the gold nanoparticles, C, by Avogadro’s number, NA **Equation S2**.

𝑁=𝑁A𝐶 (**S2**)

There is no difference between the head group of PC or HPC therefore the same estimation used for a non-hydrogenated PC membrane holds true for a hydrogenated phosphatidylcholine membrane. The head group size of PC is approximately 69.4 Å2 and from this a rough estimate is made for the amount of lipids needed to completely cover the surface of the AuNPs.2 Using these parameters, it is estimated that a single AuNP of 5 nm, 10 nm, or 20 nm diameters needs 113 lipids for 5 nm, 452 lipids for 10 nm, and 1810 lipids for 20 nm to make a monolayer of hydrogenated phosphatidylcholine. An additional 367 lipids are needed for 5 nm, 887 lipids are needed for 10 nm, and 2607 lipids are needed for 20 nm to produce a bilayer-coated with an estimated outer diameter of 9 nm for 5 nm core, 14 nm for a 10 nm core, 24 nm for a 20 nm core. This comes to a total of 37.5 nmol of lipids for 5 nm, 10.5 nmol of lipids for 10 nm, and 4.7 nmol lipids for 20 nm AuNP to produce a lipid bilayer covering all nanoparticles in a 1 mL AuNP solution with an O.D. of 0.8 for 5 nm, 0.8 for 10 nm, and 1.08 for 20 nm. However, a 1 nm water cushion has been anticipated to form between the nanoparticle surface and lipid bilayer, as seen with lipid-coated glass beads in previous studies.3 Furthermore, there is the possibility of a loss of lipids during their transfer to the nanoparticle surface. In addition, the nanoparticles are an average of 5 nm, 10 nm, and 20 nm but there could be a variance on individual nanoparticle size in solution. To compensate for these possibilities 47.7 nmol of lipids were used to cover 5 nm, 10.9 nmol lipids for 10 nm, and 4.8 nmol lipids for 20 nm AuNPs in a 1 mL solution with an O.D. of 0.8 for 5 nm, 0.8 for 10 nm, and 1.08 for 20 nm.

For the synthesis of the hybrid HPC-AuNPs, sodium oleic acid (SOA) was added to the AuNP solution prior to the addition of the hydrogenated phosphatidylcholine. After the AuNPs were incubated with SOA for 20 min they were then incubated with the HPC lipids for an additional 40 min. This is followed by the addition of Hexanethiol for a final 30 min. The finished hybrid Au-SOA-HPC-HT are then subjected to cyanide etch studies to test that their membranes are intact and robust.

**References**

1. Mackiewicz, M. R.; Hodges, H. L.; Reed, S. M., C-reactive protein induced rearrangement of phosphatidylcholine on nanoparticle mimics of lipoprotein particles. *The Journal of Physical Chemistry B* **2010,** *114* (16), 5556-5562.

2. Nagle, J. F.; Tristram-Nagle, S., Structure of lipid bilayers. *Biochimica et Biophysica Acta (BBA)-Reviews on Biomembranes* **2000,** *1469* (3), 159-195.

3. Bayerl, T. M.; Bloom, M., Physical properties of single phospholipid bilayers adsorbed to micro glass beads. A new vesicular model system studied by 2H-nuclear magnetic resonance. *Biophys J* **1990,** *58* (2), 357-62.
